# Supplementary material for: Unique Features of a Pseudomonas aeruginosa α2-Macroglobulin Homolog
Source: PubMed Central journal article supplement — mBio. 2013 Aug 6;4(4):e00309-13. doi: 10.1128/mBio.00309-13 (PMC3735191; doi:10.1128/mbio.00309-13), 2013-08-06
Supplement: mbo004131583s1.pdf [file mbo004131583s1.pdf]

1 **Robert-Genthon et al.,**

2

3 **Supp Materials and Methods**

4

5 **Proteomic analyses**

6 ***Protein digestion***

7 Proteins were stacked on the top of a 4-12% NuPAGE gel (Invitrogen) and stained with R-250  
8 Coomassie blue. The gel bands were manually excised and cut in pieces before being washed  
9 by 6 successive incubations of 15 min in 25 mM NH<sub>4</sub>HCO<sub>3</sub> and in 25mM NH<sub>4</sub>HCO<sub>3</sub> containing  
10 50% (v/v) acetonitrile. Gel pieces were then dehydrated with 100 % acetonitrile and  
11 incubated for 45 min at 53°C with 10 mM DTT in 25mM NH<sub>4</sub>HCO<sub>3</sub> and for 35 min in the dark  
12 with 55 mM iodoacetamide in 25mM NH<sub>4</sub>HCO<sub>3</sub>. Alkylation was stopped by adding 10 mM  
13 DTT in 25mM NH<sub>4</sub>HCO<sub>3</sub> and mixing for 10 min. Gel pieces were then washed again by  
14 incubation in 25 mM NH<sub>4</sub>HCO<sub>3</sub> before dehydration with 100% acetonitrile. 0.15 µg of  
15 modified trypsin (Promega, sequencing grade) in 25 mM NH<sub>4</sub>HCO<sub>3</sub> was added to the  
16 dehydrated gel pieces for an overnight incubation at 37°C. Peptides were then extracted  
17 from gel pieces in three 15 min sequential extraction steps in 30 µL of 50% acetonitrile, 30  
18 µL of 5% formic acid and finally 30µL of 100% acetonitrile. The pooled supernatants were  
19 then dried under vacuum. ***Nano-LC-MS/MS analyses.*** The dried extracted peptides were  
20 resuspended in 5% acetonitrile and 0.1% trifluoroacetic acid and analyzed by online nanoLC-  
21 MS/MS (Ultimate 3000, Dionex and LTQ-Orbitrap Velos pro, Thermo Fischer Scientific).  
22 Peptides were sampled on a 300 µm x 5 mm PepMap C18 precolumn and separated on a 75  
23 µm x 250 mm C18 column (PepMap, Dionex). The nanoLC method consisted in a 120-minute  
24 gradient at a flow rate of 300 nl/min, ranging from 5% to 37% acetonitrile in 0.1% formic

25 acid during 114 min before reaching 72% for the last 6 minutes. MS and MS/MS data were  
26 acquired using Xcalibur (Thermo Fischer Scientific). Spray voltage and heated capillary were  
27 respectively set at 1.4 kV and 200°C. Survey full-scan MS spectra ( $m/z = 400\text{--}1600$ ) were  
28 acquired in the Orbitrap with a resolution of 60 000 after accumulation of  $10^6$  ions  
29 (maximum filling time: 500 ms). The 20 most intense ions from the preview survey scan  
30 delivered by the Orbitrap were fragmented by collision induced dissociation (collision energy  
31 35%) in the LTQ after accumulation of  $10^4$  ions (maximum filling time: 100 ms).  
32 **Bioinformatics analyses.** Data were processed automatically using Mascot Daemon software  
33 (version 2.3.2, Matrix Science). Concomitant searches against PA01-UW strain protein  
34 sequence databank (February 1, 2012 release from [www.pseudomonas.com](http://www.pseudomonas.com), 5572 entries),  
35 classical contaminants database (67 sequences, homemade) and the corresponding reversed  
36 databases were performed using Mascot (version 2.4). ESI-TRAP was chosen as the  
37 instrument, trypsin/P as the enzyme and 2 missed cleavage allowed. Precursor and fragment  
38 mass error tolerances were set respectively at 10 ppm and 0.6 Da. Peptide modifications  
39 allowed during the search were: carbamidomethyl (C, fixed) acetyl (N-ter, variable),  
40 oxidation (M, variable) and deamidation (NQ, variable). The IRMa software (version 1.31.1)  
41 was used to filter the results: conservation of rank 1 peptides, peptide identification FDR <  
42 1% (as calculated by employing the reverse database strategy), and minimum of 1 specific  
43 peptide per identified protein group. The filtered results were uploaded into a relational  
44 mass spectrometry identification database (MSIdb) and a homemade tool was used for the  
45 compilation, grouping and comparison of the protein groups from the different samples.  
46
